# Supplementary material for: Knockout of Multiple Arabidopsis Cation/H+ Exchangers Suggests Isoform-Specific Roles in Metal Stress Response, Germination and Seed Mineral Nutrition
Source: PubMed Central journal article supplement (PMC3470555; doi:10.1371/journal.pone.0047455), 2012-10-12
Supplement: pone.0047455.s007.pdf [file pone.0047455.s007.pdf]

**Table S1. Univariate statistical analysis of the fresh weight of CAX mutant plants in response to metal stress.** The fresh weight of Col-0 (wild type) and *cax* knockout seedlings was determined 21 d after sowing on 0.5× MS (pH 5.6) medium supplemented with 25 mM CaCl<sub>2</sub>, 10 μM CdCl<sub>2</sub>, 10 mM LiCl, 50 mM NaCl, 25 mM MgCl<sub>2</sub>, 1.5 mM MnCl<sub>2</sub>, or no supplements, then incubation at 22°C under a 16 h light/8 h dark cycle. A two-way ANOVA with Tukey post-hoc test on the variance in fresh weight of mutant seedlings in response to metal stress identified the following significant differences (\*  $P < 0.05$ ; \*\*  $P < 0.01$ ; \*\*\*  $P < 0.001$ );  $n = 889$ .

| Genotype         | Col-0 | <i>cax1</i> | <i>cax2</i> | <i>cax3</i> | <i>cax1/cax2</i> |
|------------------|-------|-------------|-------------|-------------|------------------|
| Col-0            |       |             |             |             |                  |
| <i>cax1</i>      | **    |             |             |             |                  |
| <i>cax2</i>      |       |             |             |             |                  |
| <i>cax3</i>      |       | ***         |             |             |                  |
| <i>cax1/cax2</i> | ***   |             | *           | ***         |                  |
| <i>cax2/cax3</i> |       | ***         |             |             | ***              |
