# Supplementary material for: Knockout of Multiple Arabidopsis Cation/H+ Exchangers Suggests Isoform-Specific Roles in Metal Stress Response, Germination and Seed Mineral Nutrition
Source: PubMed Central journal article supplement (PMC3470555; doi:10.1371/journal.pone.0047455), 2012-10-12
Supplement: pone.0047455.s008.pdf [file pone.0047455.s008.pdf]

**Table S2. Univariate statistical analysis of the viability of CAX mutant seeds in response to metal stress.** The viability of Col-0 (wild type) and *cax* knockout seeds was determined 10 d after sowing on 1% agar medium alone or supplemented with 25 mM CaCl<sub>2</sub>, 10 μM CdCl<sub>2</sub>, 10 mM LiCl, 50 mM NaCl, 25 mM MgCl<sub>2</sub>, or 1.5 mM MnCl<sub>2</sub>. Following sowing, seeds were stratified for 2 d at 4°C in the dark then incubated at 22°C under a 16 h light/8 h dark cycle. Any seeds not germinated after 10 d were considered non-viable. A two-way ANOVA with Tukey post-hoc test on the viability of seeds of the various mutants in response to metal stress identified the following significant differences (\*  $P < 0.05$ );  $n = 105$ .

| Genotype         | Col-0 | <i>cax1</i> | <i>cax2</i> | <i>cax3</i> | <i>cax1/cax2</i> |
|------------------|-------|-------------|-------------|-------------|------------------|
| Col-0            |       |             |             |             |                  |
| <i>cax1</i>      |       |             |             |             |                  |
| <i>cax2</i>      |       |             |             |             |                  |
| <i>cax3</i>      |       |             |             |             |                  |
| <i>cax1/cax2</i> | *     | *           | *           |             |                  |
| <i>cax2/cax3</i> |       |             |             |             |                  |
