# Supplementary material for: Knockout of Multiple Arabidopsis Cation/H+ Exchangers Suggests Isoform-Specific Roles in Metal Stress Response, Germination and Seed Mineral Nutrition
Source: PLoS One. 2012 Oct 12;7(10):e47455. doi: 10.1371/journal.pone.0047455 (PMC3470555; doi:10.1371/journal.pone.0047455)
Supplement: Table S3 — The effects of inhibitors on H+ pump hydrolytic activity in vacuolar-enriched membrane vesicles. Membrane vesicles were prepared from 2-week-old Col-0 (wild type) plants. ATPase activity (µmol Pi mg−1 protein h−1) at pH 8.0 (unless indicated) was measured in the presence of 2 mM ATP, 2 mM MgSO4 and 50 mM KCl. Pyrophosphatase (PPase) activity (µmol Pi mg−1 protein h−1) at pH 8.0 was measured in the presence of 0.1 mM pyrophosphate, 5 mM MgSO4 and 50 mM KCl. All reactions were performed over a 1 h incubation period at 37°C. Inhibitors of the plasma membrane H+-ATPase (vanadate), tonoplast H+-ATPase (nitrate and bafilomycin), mitochondrial ATPase (azide) and tonoplast K+-dependent H+-PPase (- KCl) were used. Mean activity (±SE) from three replicates is shown. n.d. – not determined. (PDF) [file pone.0047455.s009.pdf]

**Table S3. The effects of inhibitors on H<sup>+</sup> pump hydrolytic activity in vacuolar-enriched membrane vesicles.** Membrane vesicles were prepared from 2-week-old Col-0 (wild type) plants. ATPase activity ( $\mu\text{mol Pi mg}^{-1} \text{ protein h}^{-1}$ ) at pH 8.0 (unless indicated) was measured in the presence of 2 mM ATP, 2 mM  $\text{MgSO}_4$  and 50 mM KCl. Pyrophosphatase (PPase) activity ( $\mu\text{mol Pi mg}^{-1} \text{ protein h}^{-1}$ ) at pH 8.0 was measured in the presence of 0.1 mM pyrophosphate, 5 mM  $\text{MgSO}_4$  and 50 mM KCl. All reactions were performed over a 1 hour incubation period at 37°C. Inhibitors of the plasma membrane H<sup>+</sup>-ATPase (vanadate), tonoplast H<sup>+</sup>-ATPase (nitrate and bafilomycin), mitochondrial ATPase (azide) and tonoplast K<sup>+</sup>-dependent H<sup>+</sup>-PPase (- KCl) were used. Mean activity ( $\pm$  SE) from three replicates is shown. n.d. – not determined.

| Treatment                        | ATPase activity  | % inhibition | PPase activity   | % inhibition |
|----------------------------------|------------------|--------------|------------------|--------------|
| Control                          | 16.98 $\pm$ 1.23 | 0            | 19.20 $\pm$ 2.46 | 0            |
| Vanadate (0.1 mM) at pH 8        | 15.82 $\pm$ 1.91 | 6.8          | 17.80 $\pm$ 1.20 | 7.3          |
| Vanadate (0.1 mM) at pH 6.5      | 14.95 $\pm$ 1.72 | 12           | n.d.             | n.d.         |
| Azide (1 mM)                     | 15.06 $\pm$ 2.54 | 11.3         | 20.52 $\pm$ 2.16 | -6.9         |
| Nitrate (50 mM)                  | 6.07 $\pm$ 0.11  | 64.3         | 17.43 $\pm$ 2.60 | 9.2          |
| Bafilomycin (0.2 $\mu\text{M}$ ) | 3.19 $\pm$ 0.07  | 81.2         | 18.87 $\pm$ 1.93 | 1.7          |
| No KCl                           | 9.43 $\pm$ 0.78  | 44.5         | 4.81 $\pm$ 0.21  | 74.9         |
